# Supplementary material for: The relationship between nuclear factor (NF)-κB family gene expression and prognosis in triple-negative breast cancer (TNBC) patients receiving adjuvant doxorubicin treatment
Source: PubMed Central journal article supplement (PMC4992884; doi:10.1038/srep31804), 2016-08-22

**The relationship between Nuclear factor (NF)- $\kappa$ B family gene expression and prognosis in triple-negative breast cancer(TNBC) patients receiving adjuvant doxorubicin treatment**

Ji-Yeon Kim<sup>1,\*</sup>, Hae Hyun Jung<sup>5,\*</sup>, Soomin Ahn<sup>3</sup>, SooYoun Bae<sup>4</sup>, Se Kyung Lee<sup>4</sup>, Seok Won Kim<sup>4</sup>,  
Jeong Eon Lee<sup>4</sup>, Seok Jin Nam<sup>4</sup>, Jin Seok Ahn<sup>1</sup>, Young-Hyuck Im<sup>1,2</sup> and Yeon Hee Park<sup>1,2,5</sup>

<sup>1</sup>Division of Hematology-Oncology, Department of Medicine, <sup>2</sup>Biomedical Research Institute,  
<sup>3</sup>Cancer of Companion Diagnostics, <sup>4</sup>Department of Surgery, Samsung Medical Center, Seoul 06351,  
Korea; <sup>5</sup>Department of Health Sciences and Technology, SAIHST, Sungkyunkwan University, Seoul  
06351, Korea

## **Supplementary Figure Legends**

**Supplementary Fig. 1.** Patient cohort (N=203)

**Supplementary Fig. 2.** Heatmap for NF- $\kappa$ B pathway associated gene expression

(A) All patients (N=203)

(B) Patients with adjuvant doxorubicin chemotherapy (N=116)

(C) Patients with adjuvant CMF chemotherapy (N=86)

**Supplementary Fig. 3.** Relationship among NF- $\kappa$ B pathway-associated gene expression in TNBC with adjuvant doxorubicin chemotherapy

**Supplementary Table 1.** Relationships among expression of NF $\kappa$ B pathway-associated genes in TNBC

**Supplementary Table 1** Relationships among expression of NFKB pathway-associated genes in TNBC

| Clinical variables | NFKB1  | NFKB2  | RELA   | RELB   | REL    | TP53   | FOXC1  | TBP    | SP1    | STAT3  | IRF1   |
|--------------------|--------|--------|--------|--------|--------|--------|--------|--------|--------|--------|--------|
| <b>NFKB1</b>       |        |        |        |        |        |        |        |        |        |        |        |
| Pearson R          | 1      | -0.074 | -0.385 | 0.084  | 0.694  | 0.041  | -0.366 | 0.051  | -0.491 | -0.286 | -0.241 |
| P-value            |        | 0.429  | <0.001 | 0.370  | <0.001 | 0.665  | <0.001 | 0.587  | <0.001 | 0.002  | 0.009  |
| <b>NFKB2</b>       |        |        |        |        |        |        |        |        |        |        |        |
| Pearson R          | -0.074 | 1      | 0.825  | 0.728  | -0.114 | -0.067 | 0.230  | 0.541  | 0.599  | 0.535  | 0.391  |
| P-value            | 0.429  |        | <0.001 | <0.001 | 0.225  | 0.477  | 0.013  | <0.001 | <0.001 | <0.001 | <0.001 |
| <b>RELA</b>        |        |        |        |        |        |        |        |        |        |        |        |
| Pearson R          | -0.385 | 0.825  | 1      | 0.560  | -0.441 | -0.033 | 0.449  | 0.430  | 0.845  | 0.697  | 0.453  |
| P-value            | <0.001 | <0.001 |        | <0.001 | <0.001 | 0.728  | <0.001 | <0.001 | <0.001 | <0.001 | <0.001 |
| <b>RELB</b>        |        |        |        |        |        |        |        |        |        |        |        |
| Pearson R          | 0.084  | 0.728  | 0.560  | 1      | 0.027  | 0.203  | 0.127  | 0.391  | 0.349  | 0.549  | 0.612  |
| P-value            | 0.370  | <0.001 | <0.001 |        | 0.777  | 0.029  | 0.176  | <0.001 | <0.001 | <0.001 | <0.001 |
| <b>REL</b>         |        |        |        |        |        |        |        |        |        |        |        |
| Pearson R          | 0.694  | -0.114 | -0.441 | 0.027  | 1      | 0.033  | -0.367 | 0.082  | -0.542 | -0.313 | -0.222 |
| P-value            | <0.001 | 0.225  | <0.001 | 0.777  |        | 0.727  | <0.001 | 0.382  | <0.001 | 0.001  | 0.017  |
| <b>TP53</b>        |        |        |        |        |        |        |        |        |        |        |        |
| Pearson R          | 0.041  | -0.067 | -0.033 | 0.203  | 0.033  | 1      | -0.009 | -0.050 | -0.079 | -0.012 | 0.081  |
| P-value            | 0.665  | 0.477  | 0.728  | 0.029  | 0.727  |        | 0.925  | 0.595  | 0.399  | 0.900  | 0.385  |
| <b>FOXC1</b>       |        |        |        |        |        |        |        |        |        |        |        |
| Pearson R          | -0.366 | 0.230  | 0.449  | 0.127  | -0.367 | -0.009 | 1      | 0.007  | 0.455  | 0.273  | 0.193  |
| P-value            | <0.001 | 0.013  | <0.001 | 0.176  | <0.001 | 0.925  |        | 0.942  | <0.001 | 0.003  | 0.038  |
| <b>TBP</b>         |        |        |        |        |        |        |        |        |        |        |        |
| Pearson R          | 0.051  | 0.541  | 0.430  | 0.391  | 0.082  | -0.050 | 0.007  | 1      | 0.324  | 0.249  | 0.158  |
| P-value            | 0.587  | <0.001 | <0.001 | <0.001 | 0.382  | 0.595  | 0.942  |        | <0.001 | 0.007  | 0.090  |
| <b>SP1</b>         |        |        |        |        |        |        |        |        |        |        |        |
| Pearson R          | -0.491 | 0.599  | 0.845  | 0.349  | -0.542 | -0.079 | 0.455  | 0.324  | 1      | 0.619  | 0.398  |
| P-value            | <0.001 | <0.001 | <0.001 | <0.001 | <0.001 | 0.399  | <0.001 | <0.001 |        | <0.001 | <0.001 |
| <b>STAT3</b>       |        |        |        |        |        |        |        |        |        |        |        |
| Pearson R          | -0.286 | 0.535  | 0.697  | 0.549  | -0.313 | -0.012 | 0.273  | 0.249  | 0.619  | 1      | 0.643  |
| P-value            | 0.002  | <0.001 | <0.001 | <0.001 | 0.001  | 0.900  | 0.003  | 0.007  | <0.001 |        | <0.001 |
| <b>IRF1</b>        |        |        |        |        |        |        |        |        |        |        |        |
| Pearson R          | -0.241 | 0.391  | 0.453  | 0.612  | -0.222 | 0.081  | 0.193  | 0.158  | 0.398  | 0.643  | 1      |
| P-value            | 0.009  | <0.001 | <0.001 | <0.001 | 0.017  | 0.385  | 0.038  | 0.090  | <0.001 | <0.001 |        |

Supplementary Fig. 1.

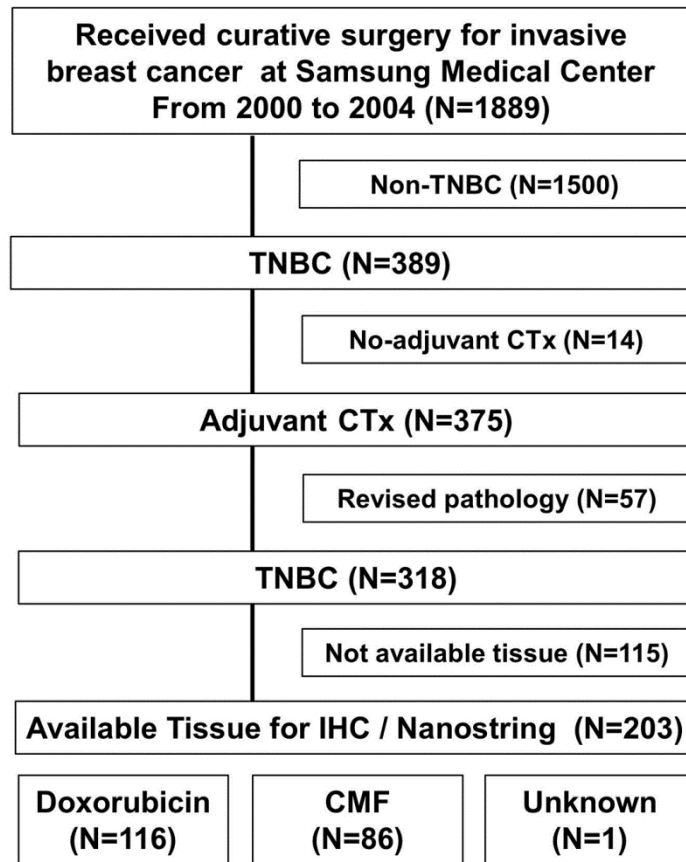

Supplementary Fig. 2.

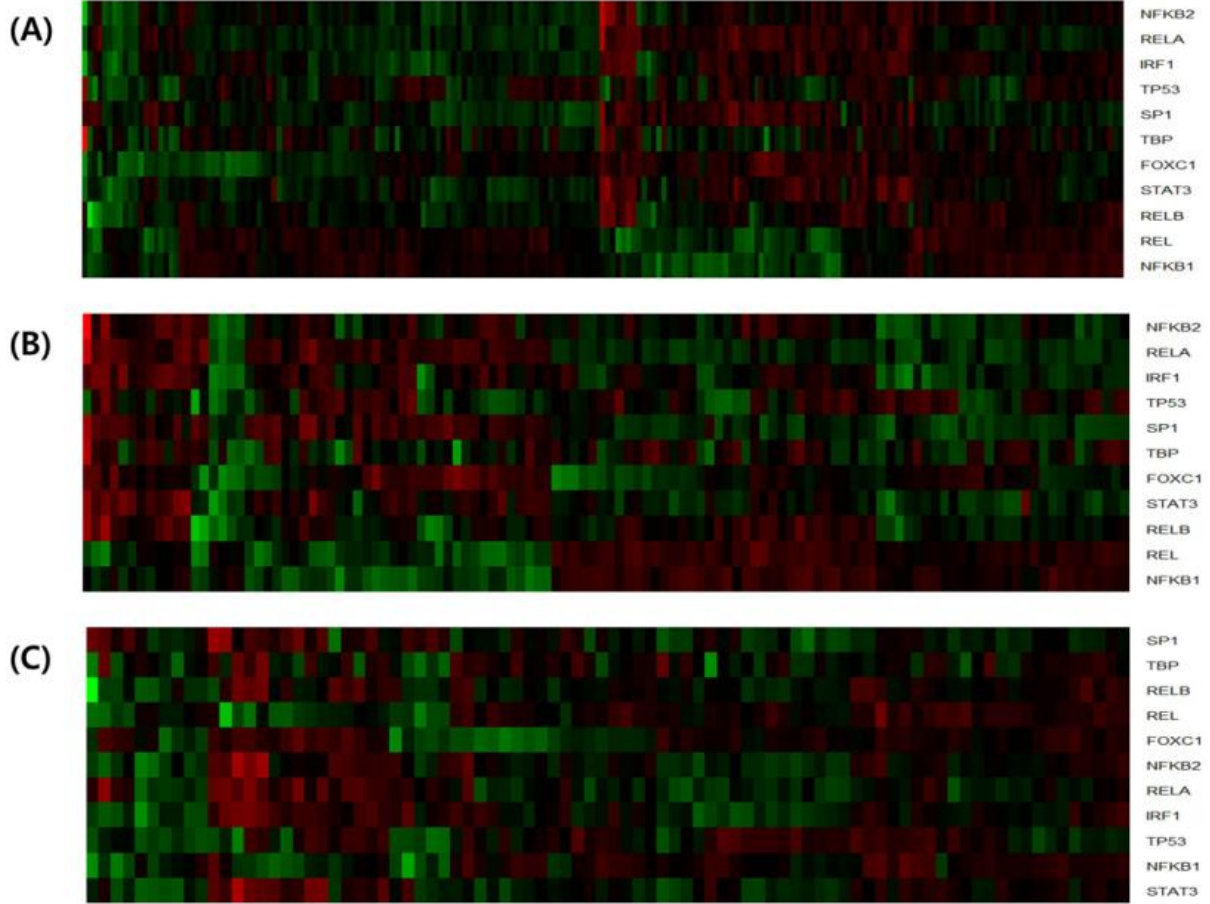

Supplement: srep31804-s1.pdf [file srep31804-s1.pdf]
